# Supplementary material for: The genomic landscape across 474 surgically accessible epileptogenic human brain lesions
Source: bioRxiv or medRxiv preprint supplement (doi:10.1101/2022.03.14.22271705), 2022-03-15
Supplement: Supplementary file [file media-1.pdf]

## Supplementary Results

The *SLC35A2* gene has been previously associated with mild MCD or FCD type 1<sup>1,2</sup> but was more recently confirmed as a genetic marker for the MOGHE phenotype.<sup>3-5</sup> We originally identified four FCD 1a or mMCD samples with *SLC35A2* variants. However, upon in-depth review of histopathological imaging, we determined that the pathological phenotypes of these samples more closely matched MOGHE and reclassified them accordingly. Thus, we detected alterations in *SLC35A2* exclusively in MOGHE samples. Accordingly, we observed a strong association between *SLC35A2* and MOGHE, with 47.1% (16/35) of MOGHE samples carrying a variant in *SLC35A2*.

As expected, alterations in *FGFR1* were exclusively identified in DNET (29%, 7/24), with multiple alterations identified in the majority of cases (71%, 5/7 *FGFR1*-DNET).<sup>6,7</sup> Variants in *BRAF* were strongly associated with ganglioglioma<sup>8</sup>, with 77.6% (52/67) of detected *BRAF* alterations occurring in ganglioglioma and 57.5% (46/80) of ganglioma carrying at least one alteration in *BRAF*. Of these, the majority (40/46, 87%) carried the *BRAFV600E* variant. Furthermore, *BRAFV600E* was detected in all three pleomorphic xanthoastrocytoma<sup>7</sup> samples in our cohort. Of note, we observed six ganglioglioma with both a somatic *BRAF* SNV and a somatic duplication covering the *BRAF* gene (7.5%), one sample with two separate somatic duplications covering *BRAF*, and one sample with two different SNV in *BRAF* (V600E and A764V).

Our gene enrichment analysis revealed a strong association between LEAT and *PTPN11* (Figure 3). Our somatic variant gene discovery also revealed novel associations between epileptogenic brain lesions and two different RAS genes, *NRAS* and *KRAS*. Alterations in *NRAS* showed a strong association with polymicrogyria (PMG) and were exclusively detected in 17% of PMG (2/12). We detected a singular somatic *KRAS* SNV in a cancer driving site in a case of meningioangiomas (50%, 1/2), a lesion typically associated with the germline neurofibromatosis 2, but not somatic variants in *NF2*.<sup>9,10</sup> To the best of our knowledge, we are the first to report an association between RAS genes and epileptogenic lesions. Lastly, we identified an association between somatic alterations in *NFI* and epileptogenic brain lesions. We detected nine *NFI* alterations across seven LEAT, which included two ganglioglioma, two DNET, and three gliomas (Fig 3A). Among these, we identified DNET sample carrying two distinct somatic *NFI* SNV (a splicing variant and a stopgain) and a pilocytic astrocytoma carrying a somatic *NFI* PTV and a somatic CNN-LOH covering *NFI*. We also identified an additional seven *NFI* alterations across five MCD, which

included four FCD II and a single PMG (Fig 3A). From these, we only detected more than one variant in the PMG, which carried three distinct *NFI* alterations (T30K, G26X, and a somatic CNN-LOH covering *NFI*). Our results expand the spectrum of epileptogenic brain lesions associated to variants in the canonical RAS-RAF-MAPK pathway and serve as a foundation for untangling the role of this pathway in lesional epilepsies.

Supplementary Table 1: Top hits from gene enrichment analysis

| Gene                                                 | Synonymous variants | Missense variants | Nonsense variants | Splice variants | Insertions/deletions | $P_{\text{global}}$ (unadjusted) | $Q_{\text{global}}$ |
|------------------------------------------------------|---------------------|-------------------|-------------------|-----------------|----------------------|----------------------------------|---------------------|
| <b>Hippocampal Sclerosis (n=97)</b>                  |                     |                   |                   |                 |                      |                                  |                     |
| <i>NUDT14</i>                                        | 0                   | 0                 | 0                 | 0               | 1                    | 0.001052                         | 1                   |
| <i>TEX45</i>                                         | 0                   | 0                 | 0                 | 0               | 1                    | 0.001724                         | 1                   |
| <i>FKBP10</i>                                        | 0                   | 0                 | 0                 | 0               | 1                    | 0.001858                         | 1                   |
| <i>ARNT</i>                                          | 0                   | 0                 | 0                 | 0               | 1                    | 0.00216                          | 1                   |
| <i>UNC5C</i>                                         | 0                   | 0                 | 0                 | 0               | 1                    | 0.002331                         | 1                   |
| <b>Malformations of cortical development (n=223)</b> |                     |                   |                   |                 |                      |                                  |                     |
| <i>SLC35A2</i>                                       | 0                   | 7                 | 2                 | 0               | 3                    | 0                                | <b>0</b>            |
| <i>MTOR</i>                                          | 0                   | 11                | 0                 | 0               | 1                    | 2.56E-10                         | <b>2.57E-06</b>     |
| <i>AKT3</i>                                          | 0                   | 3                 | 0                 | 0               | 0                    | 3.47E-04                         | 1                   |
| <i>OR9G1</i>                                         | 0                   | 4                 | 0                 | 0               | 0                    | 7.59E-04                         | 1                   |
| <i>OR9G9</i>                                         | 0                   | 4                 | 0                 | 0               | 0                    | 7.59E-04                         | 1                   |
| <i>NRAS</i>                                          | 0                   | 2                 | 0                 | 0               | 0                    | 0.002669                         | 1                   |
| <i>CD3G</i>                                          | 0                   | 0                 | 0                 | 0               | 1                    | 0.003661                         | 1                   |
| <b>Low-grade epilepsy-associated tumors (n=154)</b>  |                     |                   |                   |                 |                      |                                  |                     |
| <i>BRAF</i>                                          | 0                   | 39                | 0                 | 0               | 3                    | 0                                | <b>0</b>            |
| <i>PTPN11</i>                                        | 0                   | 6                 | 0                 | 0               | 0                    | 4.19E-08                         | <b>4.21E-04</b>     |
| <i>FGFR1</i>                                         | 0                   | 4                 | 0                 | 0               | 0                    | 2.62E-05                         | 0.175515            |
| <i>OR4C3</i>                                         | 0                   | 4                 | 0                 | 0               | 0                    | 3.16E-04                         | 1                   |
| <i>AURKC</i>                                         | 0                   | 1                 | 0                 | 0               | 1                    | 3.59E-04                         | 1                   |
| <i>NF1</i>                                           | 0                   | 0                 | 0                 | 0               | 2                    | 7.76E-04                         | 1                   |
| <i>RARA</i>                                          | 0                   | 1                 | 0                 | 0               | 1                    | 0.001494                         | 1                   |
| <i>HSPA2</i>                                         | 0                   | 1                 | 0                 | 0               | 1                    | 0.002737                         | 1                   |
| <i>GNRH2</i>                                         | 0                   | 0                 | 0                 | 0               | 1                    | 0.004502                         | 1                   |

**Supplementary Table 2: Identified cancer drivers**

| <b>Gene</b>   | <b>Known driver site</b> | <b>Samples with variants</b> | <b>Associated pathology</b> | <b>Specific sample pathologies</b> |
|---------------|--------------------------|------------------------------|-----------------------------|------------------------------------|
| <i>BRAF</i>   | p.V600                   | 45                           | LEAT                        | Ganglioglioma, PXA, MVNT           |
| <i>MTOR</i>   | p.S2215                  | 3                            | MCD                         | FCD type IIb, HME                  |
|               | p.T1977                  | 1                            | MCD                         | FCD type IIb                       |
|               | p.L1460                  | 1                            | MCD                         | FCD type IIb                       |
| <i>NRAS</i>   | p.Q61                    | 2                            | MCD                         | PMG                                |
| <i>PTPN11</i> | p.A72                    | 2                            | LEAT                        | DNET                               |
|               | p.E76                    | 1                            | LEAT                        | Ganglioglioma                      |
| <i>KRAS</i>   | p.G12                    | 1                            | LEAT                        | Meningioangiomas                   |
| <i>PIK3CA</i> | p.V344                   | 1                            | LEAT                        | DNET                               |
|               | p.E545                   | 1                            | MCD                         | HME                                |

**Legend:** PXA = Pleomorphic xanthoastrocytoma, MVNT = Multinodular vacuolated neuronal tumor, FCD = Focal cortical dysplasia, HME = Hemimegalencephaly, PMG = Polymicrogyria, DNET = Dysembryoplastic Neuroepithelial tumor

**Supplementary table 3: Phenotypic review of genetic-positive samples**

| Sample name  | Lesion category | Original pathology | Genetic diagnosis                              | Revised pathology                   | Additional information        | Conclusion after histopathological review |
|--------------|-----------------|--------------------|------------------------------------------------|-------------------------------------|-------------------------------|-------------------------------------------|
| MCD_EEBB_26  | MCD             | HME                | <i>PIK3CA</i>                                  | Complex MCD                         | HME / PMG / FCD 2a            | phenotype refinement                      |
| MCD_EEBB_57  | MCD             | HME                | <i>AKT3, MTOR</i>                              | Complex MCD                         | HME / PMG / FCD 2a            | phenotype refinement                      |
| MCD_EEBB_52  | MCD             | HME                | <i>PIK3CA</i>                                  | Complex MCD                         | HME / PMG / FCD 2a            | phenotype refinement                      |
| MCD_EEBB_10  | MCD             | PMG                | <i>NRAS</i>                                    | Complex MCD                         | PMG / NH / FCD 2a / GG        | phenotype refinement                      |
| MCD_EEBB_89  | MCD             | PMG                | <i>NF1</i> SNV + CNN-LOH                       | Complex MCD                         | PMG / FCD 1b                  | phenotype refinement                      |
| MCD_EEBB_65  | MCD             | PMG                | <i>NRAS</i>                                    | Complex MCD                         | PMG / NH / FCD 2a / DNET      | phenotype refinement                      |
| MCD_EEBB_21  | MCD             | PMG                | <i>PIK3CA</i>                                  | Complex MCD                         | HME / PMG / FCD 2a            | reclassification                          |
| MCD_CCF_93   | MCD             | FCD (NOS)          | <i>AKT3</i>                                    | Complex MCD                         | HME / PMG / FCD 2a            | reclassification                          |
| MCD_CCF_94   | MCD             | FCD (NOS)          | <i>PTEN</i> SNV + CNN-LOH                      | Complex MCD                         | HME / PMG / FCD 2a / FCD 1a   | reclassification                          |
| MCD_CCF_110  | MCD             | FCD (NOS)          | <i>AKT3</i>                                    | Complex MCD                         | HME / PMG / FCD 2a            | reclassification                          |
| MCD_CCF_32   | MCD             | FCD (NOS)          | <i>NPRL3</i>                                   | Complex MCD                         | PMG / FCD 2a / FCD 1a         | reclassification                          |
| MCD_CCF_104  | MCD             | FCD (NOS)          | <i>MTOR, TSC2</i> SNV + CNN-LOH                | Complex MCD                         | PMG / FCD 2b                  | reclassification                          |
| MCD_CCF_92   | MCD             | FCD (NOS)          | <i>MTOR</i>                                    | FCD 2b                              |                               | reclassification                          |
| MCD_CCF_101  | MCD             | FCD (NOS)          | <i>MTOR</i>                                    | FCD 2b                              |                               | reclassification                          |
| MCD_CCF_29   | MCD             | FCD (NOS)          | <i>TSC2</i>                                    | Cortical tuber                      | FCD 2b                        | reclassification                          |
| MCD_CCF_55   | MCD             | FCD (NOS)          | <i>TSC2</i>                                    | Cortical tuber                      | FCD 2b                        | reclassification                          |
| MCD_CCF_56   | MCD             | FCD (NOS)          | <i>TSC2</i>                                    | Cortical tuber                      | FCD 2b                        | reclassification                          |
| MCD_CCF_27   | MCD             | FCD 2b             | <i>TSC2</i>                                    | Cortical tuber                      | FCD 2b                        | reclassification                          |
| MCD_EEBB_76  | MCD             | FCD 2b             | <i>MTOR</i>                                    | Complex MCD                         | PMG / FCD 2b                  | reclassification                          |
| MCD_EEBB_68  | MCD             | FCD 2b             | <i>DEPDC5</i> CNN-LOH                          | FCD 2a                              |                               | reclassification                          |
| MCD_CCF_62   | MCD             | FCD 2a             | Chr 1q gain                                    | FCD 2a                              | Hyaline astrocytic inclusions | phenotype refinement                      |
| MCD_EEBB_110 | MCD             | MOGHE              | Chr 1q gain                                    | FCD 2a                              | Hyaline astrocytic inclusions | reclassification                          |
| MCD_CCF_30   | MCD             | mMCD               | <i>DEPDC5</i>                                  | FCD 2a                              |                               | reclassification                          |
| MCD_CCF_80   | MCD             | mMCD               | <i>DEPDC5</i>                                  | FCD 2a                              |                               | reclassification                          |
| MCD_EEBB_100 | MCD             | mMCD               | <i>SLC35A2</i>                                 | MOGHE                               |                               | reclassification                          |
| MCD_CCF_79   | MCD             | FCD 1a             | <i>SLC35A2</i>                                 | MOGHE                               |                               | reclassification                          |
| MCD_EEBB_58  | MCD             | FCD 1a             | <i>SLC35A2</i>                                 | MOGHE                               |                               | reclassification                          |
| MCD_EEBB_87  | MCD             | FCD 1a             | <i>SLC35A2</i>                                 | MOGHE                               |                               | reclassification                          |
| MCD_CCF_77   | MCD             | FCD 1a             | <i>DEPDC5</i>                                  | MOGHE                               | FCD 1a                        | reclassification                          |
| LEAT_CCF_6   | LEAT            | LEAT (NOS)         | <i>PTPN11</i>                                  | DNET                                |                               | reclassification                          |
| LEAT_CCF_37  | LEAT            | LEAT (NOS)         | Chr7 gain, <i>TSC2</i> (somatic) SNV + CNN-LOH | Subependymal giant cell astrocytoma |                               | reclassification                          |

Legend to supplementary table 3: MCD = Malformation of cortical development, LEAT = Low-grade epilepsy-associated tumor, FCD = Focal cortical dysplasia, NOS = Not otherwise specified, HME = Hemimegalencephaly, PMG = Polymicrogyria, mMCD = mild MCD, MOGHE = mMCD with oligodendroglial hyperplasia in epilepsy, NH = nodular heterotopia, DNET = Dysembryoplastic neuroepithelial tumor, IDA = Isomorphic diffuse astrocytoma, PXA = Pleomorphic xanthoastrocytoma, MVNT = multinodular vacuolated neuronal tumor, SEGA = Subependymal giant cell astrocytoma, GG = Ganglioglioma, CNN-LOH = Copy number neutral loss of heterozygosity

**Supplementary Table 4: Reported SNV in 19 lesional epilepsy genes**

| Sample        | Sex | Age at onset | Age at surgery | Lesion group | Pathology     | Additional findings | Gene          | Variant position(hg19) | Transcript ID | cDNA change      | Amino acid change | Variant class | Allelic fraction |
|---------------|-----|--------------|----------------|--------------|---------------|---------------------|---------------|------------------------|---------------|------------------|-------------------|---------------|------------------|
| HS_EEBB_20    | F   | 0-4          | 45-49          | HS           | HS Type I     | FCD 3a              | <i>MTOR</i>   | chr1:11188137          | NM_004958     | c.C5957G         | p.A1986G          | Missense      | 0.47             |
| HS_EEBB_41    | F   | 0-4          | 35-39          | HS           | HS Type I     |                     | <i>PTPNI1</i> | chr12:112926885        | NM_002834     | c.C1505T         | p.S502L           | Missense      | 0.02             |
| HS_EEBB_53    | M   | 0-4          | 45-49          | HS           | HS Type I     |                     | <i>TSC1</i>   | chr9:135772010         | NM_000368     | c.G3107A         | p.G1036E          | Missense      | 0.50             |
| HS_EEBB_71    | M   | 45-49        | 70-74          | HS           | HS Type I     |                     | <i>MTOR</i>   | chr1:11301631          | NM_004958     | c.C1520T         | p.P507L           | Missense      | 0.47             |
| HS_EEBB_17    | M   | 20-24        | 25-29          | HS           | HS Type 2     | FCD 3a              | <i>PTEN</i>   | chr10:89720649         | NM_001304717  | c.1321-2A>T      | Splicing          | PTV           | 0.03             |
| LEAT_EEBB_1   | F   | 10-14        | 15-19          | LEAT         | Ganglioglioma |                     | <i>BRAF</i>   | chr7:140453136         | NM_004333     | c.T1799A         | p.V600E           | Missense      | 0.17             |
| LEAT_EEBB_10  | F   | 5-9          | 15-19          | LEAT         | Ganglioglioma |                     | <i>BRAF</i>   | chr7:140453136         | NM_004333     | c.T1799A         | p.V600E           | Missense      | 0.15             |
| LEAT_EEBB_10  | F   | 5-9          | 15-19          | LEAT         | Ganglioglioma |                     | <i>PTPNI1</i> | chr12:112888210        | NM_002834     | c.G226A          | p.E76K            | Missense      | 0.02             |
| LEAT_EEBB_100 | M   | 10-14        | 15-19          | LEAT         | Ganglioglioma |                     | <i>BRAF</i>   | chr7:140453136         | NM_004333     | c.T1799A         | p.V600E           | Missense      | 0.17             |
| LEAT_EEBB_100 | M   | 10-14        | 15-19          | LEAT         | Ganglioglioma |                     | <i>BRAF</i>   | chr7:140426307         | NM_001354609  | c.C2291T         | p.A764V           | Missense      | 0.03             |
| LEAT_EEBB_103 | F   | 15-19        | 20-24          | LEAT         | Ganglioglioma | HS Type I           | <i>BRAF</i>   | chr7:140453136         | NM_004333     | c.T1799A         | p.V600E           | Missense      | 0.36             |
| LEAT_EEBB_106 | F   | 0-4          | 30-34          | LEAT         | Ganglioglioma | HS Type I           | <i>BRAF</i>   | chr7:140453136         | NM_004333     | c.T1799A         | p.V600E           | Missense      | 0.04             |
| LEAT_EEBB_107 | M   | 0-4          | 5-9            | LEAT         | Ganglioglioma |                     | <i>BRAF</i>   | chr7:140453136         | NM_004333     | c.T1799A         | p.V600E           | Missense      | 0.04             |
| LEAT_EEBB_108 | F   | 5-9          | 5-9            | LEAT         | Ganglioglioma |                     | <i>BRAF</i>   | chr7:140453136         | NM_004333     | c.T1799A         | p.V600E           | Missense      | 0.05             |
| LEAT_EEBB_12  | M   | 0-4          | 0-4            | LEAT         | Ganglioglioma |                     | <i>BRAF</i>   | chr7:140453136         | NM_004333     | c.T1799A         | p.V600E           | Missense      | 0.10             |
| LEAT_EEBB_14  | M   |              | 15-19          | LEAT         | Ganglioglioma |                     | <i>BRAF</i>   | chr7:140453136         | NM_004333     | c.T1799A         | p.V600E           | Missense      | 0.04             |
| LEAT_EEBB_15  | M   | 15-19        | 15-19          | LEAT         | Ganglioglioma | HS                  | <i>BRAF</i>   | chr7:140453136         | NM_004333     | c.T1799A         | p.V600E           | Missense      | 0.13             |
| LEAT_EEBB_15  | M   | 15-19        | 15-19          | LEAT         | Ganglioglioma | HS                  | <i>PTPNI1</i> | chr12:112888165        | NM_002834     | c.G181A          | p.D61N            | Missense      | 0.03             |
| LEAT_EEBB_15  | M   | 15-19        | 15-19          | LEAT         | Ganglioglioma | HS                  | <i>PTPNI1</i> | chr12:112891083        | NM_002834     | c.G417C          | p.E139D           | Missense      | 0.03             |
| LEAT_EEBB_22  | M   |              | 0-4            | LEAT         | Ganglioglioma | HS Type I           | <i>BRAF</i>   | chr7:140453136         | NM_004333     | c.T1799A         | p.V600E           | Missense      | 0.09             |
| LEAT_EEBB_22  | M   |              | 0-4            | LEAT         | Ganglioglioma | HS Type I           | <i>NFI</i>    | chr17:29579966         | NM_001042492  | c.A4121G         | p.H1374R          | Missense      | 0.44             |
| LEAT_EEBB_22  | M   |              | 0-4            | LEAT         | Ganglioglioma | HS Type I           | <i>TSC2</i>   | chr16:2130303          | NM_000548     | c.G3535A         | p.E1179K          | Missense      | 0.44             |
| LEAT_EEBB_27  | M   | 15-19        | 15-19          | LEAT         | Ganglioglioma |                     | <i>BRAF</i>   | chr7:140453136         | NM_004333     | c.T1799A         | p.V600E           | Missense      | 0.15             |
| LEAT_EEBB_32  | F   | 20-24        | 20-24          | LEAT         | Ganglioglioma |                     | <i>BRAF</i>   | chr7:140453137         | NM_004333     | c.1798delinsACAG | p.T599_V600insT   | Missense      | 0.26             |
| LEAT_EEBB_34  | M   |              | 0-4            | LEAT         | Ganglioglioma |                     | <i>BRAF</i>   | chr7:140453136         | NM_004333     | c.T1799A         | p.V600E           | Missense      | 0.19             |
| LEAT_EEBB_37  | M   | 0-4          | 40-44          | LEAT         | Ganglioglioma | HS Type I           | <i>BRAF</i>   | chr7:140453136         | NM_004333     | c.T1799A         | p.V600E           | Missense      | 0.04             |
| LEAT_EEBB_39  | F   | 0-4          | 25-29          | LEAT         | Ganglioglioma |                     | <i>BRAF</i>   | chr7:140453136         | NM_004333     | c.T1799A         | p.V600E           | Missense      | 0.12             |

|              |   |       |       |      |               |           |        |                 |              |                    |              |          |      |
|--------------|---|-------|-------|------|---------------|-----------|--------|-----------------|--------------|--------------------|--------------|----------|------|
| LEAT_EEBB_40 | F | 10-14 | 25-29 | LEAT | Ganglioglioma | HS Type 1 | BRAF   | chr7:140453136  | NM_004333    | c.T1799A           | p.V600E      | Missense | 0.20 |
| LEAT_EEBB_42 | F | 20-24 | 30-34 | LEAT | Ganglioglioma |           | BRAF   | chr7:140453136  | NM_004333    | c.T1799A           | p.V600E      | Missense | 0.08 |
| LEAT_EEBB_43 | F | 0-4   | 0-4   | LEAT | Ganglioglioma |           | BRAF   | chr7:140453136  | NM_004333    | c.T1799A           | p.V600E      | Missense | 0.25 |
| LEAT_EEBB_44 | M | 0-4   | 0-4   | LEAT | Ganglioglioma |           | BRAF   | chr7:140453136  | NM_004333    | c.T1799A           | p.V600E      | Missense | 0.04 |
| LEAT_EEBB_47 | F | 0-4   | 0-4   | LEAT | Ganglioglioma |           | BRAF   | chr7:140453136  | NM_004333    | c.T1799A           | p.V600E      | Missense | 0.08 |
| LEAT_EEBB_52 | M | 10-14 | 20-24 | LEAT | Ganglioglioma |           | BRAF   | chr7:140453136  | NM_004333    | c.T1799A           | p.V600E      | Missense | 0.09 |
| LEAT_EEBB_53 | F | 10-14 | 15-19 | LEAT | Ganglioglioma |           | BRAF   | chr7:140453136  | NM_004333    | c.T1799A           | p.V600E      | Missense | 0.04 |
| LEAT_EEBB_54 | M | 0-4   | 5-9   | LEAT | Ganglioglioma |           | BRAF   | chr7:140453136  | NM_004333    | c.T1799A           | p.V600E      | Missense | 0.18 |
| LEAT_EEBB_57 | M | 0-4   | 5-9   | LEAT | Ganglioglioma |           | BRAF   | chr7:140453136  | NM_004333    | c.T1799A           | p.V600E      | Missense | 0.13 |
| LEAT_EEBB_61 | M | 0-4   | 0-4   | LEAT | Ganglioglioma |           | BRAF   | chr7:140453136  | NM_004333    | c.T1799A           | p.V600E      | Missense | 0.15 |
| LEAT_EEBB_62 | M | 45-49 | 45-49 | LEAT | Ganglioglioma |           | TSC1   | chr9:135772994  | NM_000368    | c.G2629T           | p.V877L      | Missense | 0.03 |
| LEAT_EEBB_63 | M | 10-14 | 15-19 | LEAT | Ganglioglioma |           | BRAF   | chr7:140453136  | NM_004333    | c.T1799A           | p.V600E      | Missense | 0.12 |
| LEAT_EEBB_65 | M | 0-4   | 5-9   | LEAT | Ganglioglioma |           | BRAF   | chr7:140453136  | NM_004333    | c.T1799A           | p.V600E      | Missense | 0.23 |
| LEAT_EEBB_67 | M |       | 5-9   | LEAT | Ganglioglioma |           | BRAF   | chr7:140453136  | NM_004333    | c.T1799A           | p.V600E      | Missense | 0.12 |
| LEAT_EEBB_73 | M | 0-4   | 5-9   | LEAT | Ganglioglioma |           | BRAF   | chr7:140453136  | NM_004333    | c.T1799A           | p.V600E      | Missense | 0.14 |
| LEAT_EEBB_74 | M | 5-9   | 10-14 | LEAT | Ganglioglioma |           | BRAF   | chr7:140453136  | NM_004333    | c.T1799A           | p.V600E      | Missense | 0.14 |
| LEAT_EEBB_76 | F | 5-9   | 15-19 | LEAT | Ganglioglioma |           | BRAF   | chr7:140453136  | NM_004333    | c.T1799A           | p.V600E      | Missense | 0.16 |
| LEAT_EEBB_78 | M | 0-4   | 5-9   | LEAT | Ganglioglioma | HS Type 1 | BRAF   | chr7:140453136  | NM_004333    | c.T1799A           | p.V600E      | Missense | 0.04 |
| LEAT_EEBB_80 | M | 5-9   | 5-9   | LEAT | Ganglioglioma |           | BRAF   | chr7:140453136  | NM_004333    | c.T1799A           | p.V600E      | Missense | 0.19 |
| LEAT_EEBB_84 | M | 0-4   | 0-4   | LEAT | Ganglioglioma | HS Type 2 | BRAF   | chr7:140453136  | NM_004333    | c.T1799A           | p.V600E      | Missense | 0.21 |
| LEAT_EEBB_84 | M | 0-4   | 0-4   | LEAT | Ganglioglioma | HS Type 2 | PIK3CA | chr3:178942554  | NM_006218    | c.C2361A           | p.D787E      | Missense | 0.47 |
| LEAT_EEBB_85 | M |       | 30-34 | LEAT | Ganglioglioma |           | BRAF   | chr7:140453136  | NM_004333    | c.T1799A           | p.V600E      | Missense | 0.13 |
| LEAT_EEBB_90 | F |       | 45-49 | LEAT | Ganglioglioma |           | BRAF   | chr7:140453136  | NM_004333    | c.T1799A           | p.V600E      | Missense | 0.06 |
| LEAT_EEBB_90 | F |       | 45-49 | LEAT | Ganglioglioma |           | PTEN   | chr10:89720649  | NM_001304717 | c.1321-2A>T        | Splicing     | PTV      | 0.06 |
| LEAT_EEBB_91 | F | 5-9   | 10-14 | LEAT | Ganglioglioma |           | BRAF   | chr7:140477841  | NM_004333    | c.1465_1467delinsA | p.A489Tfs*12 | PTV      | 0.03 |
| LEAT_EEBB_94 | M | 5-9   | 5-9   | LEAT | Ganglioglioma |           | BRAF   | chr7:140453136  | NM_004333    | c.T1799A           | p.V600E      | Missense | 0.41 |
| LEAT_EEBB_96 | M | 5-9   | 5-9   | LEAT | Ganglioglioma | HS Type 1 | BRAF   | chr7:140453136  | NM_004333    | c.T1799A           | p.V600E      | Missense | 0.11 |
| LEAT_EEBB_98 | M | 15-19 | 15-19 | LEAT | Ganglioglioma |           | BRAF   | chr7:140453136  | NM_004333    | c.T1799A           | p.V600E      | Missense | 0.12 |
| LEAT_EEBB_99 | F | 0-4   | 5-9   | LEAT | Ganglioglioma |           | BRAF   | chr7:140453136  | NM_004333    | c.T1799A           | p.V600E      | Missense | 0.12 |
| LEAT_CCF_6   | F | 30-34 | 30-34 | LEAT | DNET          |           | PTPN11 | chr12:112926900 | NM_002834    | c.C1520A           | p.T507K      | Missense | 0.02 |

|               |   |       |       |      |                       |        |               |                 |              |                        |                 |          |      |
|---------------|---|-------|-------|------|-----------------------|--------|---------------|-----------------|--------------|------------------------|-----------------|----------|------|
| LEAT_EEBB_105 | F | 35-39 | 35-39 | LEAT | DNET                  |        | <i>FGFR1</i>  | chr8:38272308   | NM_001174067 | c.A2059G               | p.K687E         | Missense | 0.18 |
| LEAT_EEBB_105 | F | 35-39 | 35-39 | LEAT | DNET                  |        | <i>FGFR1</i>  | chr8:38274850   | NM_001174067 | c.A1730G               | p.N577S         | Missense | 0.11 |
| LEAT_EEBB_105 | F | 35-39 | 35-39 | LEAT | DNET                  |        | <i>NFI</i>    | chr17:29554604  | NM_001042492 | c.2389delG             | p.A797Pfs*24    | PTV      | 0.04 |
| LEAT_EEBB_33  | M | 10-14 | 15-19 | LEAT | DNET                  |        | <i>PIK3CA</i> | chr3:178952085  | NM_006218    | c.A3140G               | p.H1047R        | Missense | 0.03 |
| LEAT_EEBB_49  | F | 30-34 | 30-34 | LEAT | DNET                  |        | <i>FGFR1</i>  | chr8:38274849   | NM_001174067 | c.C1731A               | p.N577K         | Missense | 0.18 |
| LEAT_EEBB_49  | F | 30-34 | 30-34 | LEAT | DNET                  |        | <i>NFI</i>    | chr17:29665035  | NM_001042492 | c.6705-8_6705-1delinsA | Splicing        | PTV      | 0.05 |
| LEAT_EEBB_49  | F | 30-34 | 30-34 | LEAT | DNET                  |        | <i>NFI</i>    | chr17:29552151  | NM_001042492 | c.C1884G               | p.Y628X         | PTV      | 0.05 |
| LEAT_EEBB_49  | F | 30-34 | 30-34 | LEAT | DNET                  |        | <i>PTPN11</i> | chr12:112888199 | NM_002834    | c.C215T                | p.A72V          | Missense | 0.03 |
| LEAT_EEBB_6   | M | 10-14 | 10-14 | LEAT | DNET                  |        | <i>FGFR1</i>  | chr8:38272308   | NM_001174067 | c.A2059G               | p.K687E         | Missense | 0.42 |
| LEAT_EEBB_6   | M | 10-14 | 10-14 | LEAT | DNET                  |        | <i>FGFR1</i>  | chr8:38272308   | NM_001174067 | c.A2059C               | p.K687Q         | Missense | 0.42 |
| LEAT_EEBB_6   | M | 10-14 | 10-14 | LEAT | DNET                  |        | <i>FGFR1</i>  | chr8:38272319   | NM_001174067 | c.A2048G               | p.D683G         | Missense | 0.41 |
| LEAT_EEBB_60  | M | 15-19 | 20-24 | LEAT | DNET                  |        | <i>FGFR1</i>  | chr8:38272308   | NM_001174067 | c.A2059G               | p.K687E         | Missense | 0.04 |
| LEAT_EEBB_60  | M | 15-19 | 20-24 | LEAT | DNET                  |        | <i>FGFR1</i>  | chr8:38272322   | NM_001174067 | c.T2045C               | p.I682T         | Missense | 0.03 |
| LEAT_EEBB_81  | M | 45-49 | 55-59 | LEAT | DNET                  |        | <i>FGFR1</i>  | chr8:38274849   | NM_001174067 | c.C1731A               | p.N577K         | Missense | 0.23 |
| LEAT_EEBB_81  | M | 45-49 | 55-59 | LEAT | DNET                  |        | <i>PTPN11</i> | chr12:112888199 | NM_002834    | c.C215G                | p.A72G          | Missense | 0.02 |
| LEAT_EEBB_83  | M | 5-9   | 10-14 | LEAT | DNET                  |        | <i>FGFR1</i>  | chr8:38272302   | NM_001174067 | c.A2065C               | p.T689P         | Missense | 0.31 |
| LEAT_EEBB_83  | M | 5-9   | 10-14 | LEAT | DNET                  |        | <i>FGFR1</i>  | chr8:38272307   | NM_001174067 | c.A2060T               | p.K687M         | Missense | 0.30 |
| LEAT_EEBB_83  | M | 5-9   | 10-14 | LEAT | DNET                  |        | <i>FGFR1</i>  | chr8:38272321   | NM_001174067 | c.C2046G               | p.I682M         | Missense | 0.30 |
| LEAT_EEBB_83  | M | 5-9   | 10-14 | LEAT | DNET                  |        | <i>PIK3CA</i> | chr3:178921549  | NM_006218    | c.T1031G               | p.V344G         | Missense | 0.03 |
| LEAT_EEBB_2   | F |       | 35-39 | LEAT | Angiocentric glioma   |        | <i>DEPDC5</i> | chr22:32206593  | NM_001242896 | c.G1411A               | p.G471S         | Missense | 0.54 |
| LEAT_EEBB_31  | M | 10-14 | 10-14 | LEAT | MA                    | FCD 3c | <i>KRAS</i>   | chr12:25398284  | NM_033360    | c.G35A                 | p.G12D          | Missense | 0.05 |
| LEAT_EEBB_113 | M | 0-4   | 44-49 | LEAT | MVNT                  |        | <i>BRAF</i>   | chr7:140453138  | NM_004333    | c.1797delinsTACA       | p.T599_V600insT | Missense | 0.14 |
| LEAT_EEBB_95  | F | 5-9   | 35-39 | LEAT | Pilocytic Astrocytoma |        | <i>NFI</i>    | chr17:29677325  | NM_001042492 | c.7446_7450delinsC     | p.S2484ifs*4    | PTV      | 0.13 |
| LEAT_EEBB_38  | M | 10-14 | 15-19 | LEAT | PXA                   |        | <i>BRAF</i>   | chr7:140453136  | NM_004333    | c.T1799A               | p.V600E         | Missense | 0.12 |
| LEAT_EEBB_56  | M | 10-14 | 15-19 | LEAT | PXA                   |        | <i>BRAF</i>   | chr7:140453136  | NM_004333    | c.T1799A               | p.V600E         | Missense | 0.41 |
| LEAT_EEBB_56  | M | 10-14 | 15-19 | LEAT | PXA                   |        | <i>NFI</i>    | chr17:29559097  | NM_001042492 | c.G3204T               | p.L1068F        | Missense | 0.28 |
| LEAT_EEBB_59  | M |       | 15-19 | LEAT | PXA                   |        | <i>BRAF</i>   | chr7:140453136  | NM_004333    | c.T1799A               | p.V600E         | Missense | 0.22 |
| LEAT_CCF_37   | M | 0-4   | 5-9   | LEAT | TSC                   | SEGA   | <i>TSC2</i>   | chr16:2106223   | NM_000548    | c.626_628delinsC       | p.A210Vfs*24    | PTV      | 0.02 |
| LEAT_EEBB_17  | F | 0-4   | 5-9   | LEAT | TSC                   | SEGA   | <i>PTPN11</i> | chr12:112888165 | NM_002834    | c.G181C                | p.D61H          | Missense | 0.05 |



|              |   |       |       |      |        |       |         |                |                 |                  |                 |          |      |
|--------------|---|-------|-------|------|--------|-------|---------|----------------|-----------------|------------------|-----------------|----------|------|
| LEAT_EEBB_17 | F | 0-4   | 5-9   | LEAT | TSC    | SEGA  | TSC2    | chr16:2106719  | NM_000548       | c.724dupA        | p.T242Nfs*96    | PTV      | 0.46 |
| MCD_CCF_19   | M | 10-14 | 25-29 | MCD  | MOGHE  |       | SLC35A2 | chrX:48762551  | NM_005660       | c.632_635del     | p.L211Pfs*137   | PTV      | 0.05 |
| MCD_CCF_43   | M | 0-4   | 5-9   | MCD  | MOGHE  |       | SLC35A2 | chrX:48762557  | NM_005660       | c.G629A          | p.C210Y         | Missense | 0.05 |
| MCD_CCF_77   | F | 0-4   | 0-4   | MCD  | MOGHE  | FCD1a | DEPDC5  | chr22:32161000 | NM_001242896    | c.G233C          | p.R78P          | Missense | 0.40 |
| MCD_CCF_79   | F | 0-4   | 0-4   | MCD  | MOGHE  |       | SLC35A2 | chrX:48763748  | NM_005660       | c.C347A          | p.A116E         | Missense | 0.14 |
| MCD_CCF_108  | M | 5-9   | 25-29 | MCD  | MOGHE  |       | SLC35A2 | chrX:48767173  | NM_005660       | c.192delinsACCGC | p.F65Pfs*30     | PTV      | 0.24 |
| MCD_EEBB_2   | F | 0-4   | 5-9   | MCD  | MOGHE  |       | SLC35A2 | chrX:48762251  | NM_005660       | c.C935T          | p.S312F         | Missense | 0.08 |
| MCD_EEBB_17  | F | 20-24 | 55-59 | MCD  | MOGHE  |       | SLC35A2 | chrX:48762671  | NM_005660       | c.T515C          | p.L172P         | Missense | 0.03 |
| MCD_EEBB_34  | F | 10-14 | 40-44 | MCD  | MOGHE  |       | SLC35A2 | chrX:48763729  | NM_005660       | c.366delinsTCTC  | p.Y122_T123insL | Missense | 0.09 |
| MCD_EEBB_34  | F | 10-14 | 40-44 | MCD  | MOGHE  |       | SLC35A2 | chrX:48763730  | NM_005660       | c.364_365insC    | p.Y122Sfs*6     | PTV      | 0.15 |
| MCD_EEBB_37  | M | 0-4   | 25-29 | MCD  | MOGHE  |       | SLC35A2 | chrX:48762518  | NM_005660       | c.665_668delinsT | p.K222del       | Missense | 0.29 |
| MCD_EEBB_58  | M | 0-4   | 0-4   | MCD  | MOGHE  |       | SLC35A2 | chrX:48762239  | NM_005660       | c.921_947delinsT | p.S308Wfs*106   | PTV      | 0.11 |
| MCD_EEBB_63  | M | 0-4   | 5-9   | MCD  | MOGHE  |       | SLC35A2 | chrX:48762510  | NM_005660       | c.675dupA        | p.G226Rfs*29    | PTV      | 0.40 |
| MCD_EEBB_69  | F | 15-19 | 40-44 | MCD  | MOGHE  |       | SLC35A2 | chrX:48762546  | NM_005660       | c.G640C          | p.G214R         | Missense | 0.08 |
| MCD_EEBB_87  | F | 0-4   | 5-9   | MCD  | MOGHE  |       | SLC35A2 | chrX:48763773  | NM_005660       | c.C322T          | p.Q108X         | PTV      | 0.09 |
| MCD_EEBB_97  | F | 0-4   | 15-19 | MCD  | MOGHE  |       | NPRL2   | chr3:50385595  | NM_006545       | c.A892C          | p.I298L         | Missense | 0.04 |
| MCD_EEBB_97  | F | 0-4   | 15-19 | MCD  | MOGHE  |       | SLC35A2 | chrX:48762281  | NM_005660       | c.C905T          | p.S302F         | Missense | 0.08 |
| MCD_EEBB_100 | M |       | 5-9   | MCD  | MOGHE  |       | SLC35A2 | chrX:48763773  | NM_005660       | c.C322T          | p.Q108X         | PTV      | 0.25 |
| MCD_EEBB_102 | F | 0-4   | 0-4   | MCD  | MOGHE  |       | SLC35A2 | chrX:48762251  | NM_005660       | c.C935T          | p.S312F         | Missense | 0.12 |
| MCD_EEBB_106 | M | 0-4   | 5-9   | MCD  | MOGHE  |       | SLC35A2 | chrX:48762354  | NM_005660       | c.C832T          | p.Q278X         | PTV      | 0.48 |
| MCD_EEBB_22  | F | 5-9   | 25-29 | MCD  | FCD 1a |       | MTOR    | chr1:11307914  | NM_004958       | c.C1078T         | p.R360V         | Missense | 0.04 |
| MCD_CCF_8    | M | 5-9   | 20-24 | MCD  | FCD 2a |       | NF1     | chr17:29559092 | NM_001042492    | c.G3199T         | p.D1067Y        | Missense | 0.25 |
| MCD_CCF_13   | M | 0-4   | 20-24 | MCD  | FCD 2a |       | NF1     | chr17:29654761 | NM_001042492    | c.C5513G         | p.S1838C        | Missense | 0.43 |
| MCD_CCF_13   | M | 0-4   | 20-24 | MCD  | FCD 2a |       | NPRL2   | chr3:50386328  | NM_006545       | c.C562T          | p.Q188X         | PTV      | 0.53 |
| MCD_CCF_30   | M | 0-4   | 15-19 | MCD  | FCD 2a |       | DEPDC5  | chr22:32193632 | NM_001242896    | c.G814T          | p.V272L         | Missense | 0.46 |
| MCD_CCF_46   | F | 5-9   | 25-29 | MCD  | FCD 2a |       | NPRL3   | chr16:142605   | ENST00000399953 | c.1149dupC       | p.A384Rfs*71    | PTV      | 0.50 |
| MCD_CCF_58   | F | 0-4   | 0-4   | MCD  | FCD 2a |       | NPRL3   | chr16:143291   | ENST00000399953 | c.G957A          | p.W319X         | PTV      | 0.56 |
| MCD_CCF_60   | F | 0-4   | 0-4   | MCD  | FCD 2a |       | NPRL2   | chr3:50388010  | NM_006545       | c.73dupT         | p.Y25Lfs*5      | PTV      | 0.57 |
| MCD_CCF_80   | F | 45-49 | 55-59 | MCD  | FCD 2a |       | DEPDC5  | chr22:32233122 | NM_001242896    | c.C2335G         | p.P779A         | Missense | 0.49 |

|             |   |       |       |     |        |                             |        |                |                 |                  |                   |          |      |
|-------------|---|-------|-------|-----|--------|-----------------------------|--------|----------------|-----------------|------------------|-------------------|----------|------|
| MCD_CCF_83  | F | 0-4   | 5-9   | MCD | FCD 2a |                             | NPRL3  | chr16:136827   | ENST00000399953 | c.1584delT       | p.M529Cfs*23      | PTV      | 0.48 |
| MCD_EEBB_18 | M | 5-9   | 10-14 | MCD | FCD 2a |                             | BRAF   | chr7:140549970 | NM_004333       | c.A181G          | p.L61V            | Missense | 0.42 |
| MCD_EEBB_56 | M | 0-4   | 0-4   | MCD | FCD 2a |                             | NPRL3  | chr16:143268   | ENST00000399953 | c.C980T          | p.P327L           | Missense | 0.42 |
| MCD_EEBB_75 | M | 0-4   | 10-14 | MCD | FCD 2a |                             | DEPDC5 | chr22:32239185 | NM_001242896    | c.C2620T         | p.R874X           | PTV      | 0.43 |
| MCD_EEBB_86 | M | 15-19 | 40-44 | MCD | FCD 2a |                             | MTOR   | chr1:11217230  | NM_004958       | c.G4448A         | p.C1483Y          | Missense | 0.05 |
| MCD_EEBB_88 | M | 0-4   | 5-9   | MCD | FCD 2a |                             | NPRL3  | chr16:143268   | ENST00000399953 | c.C980T          | p.P327L           | Missense | 0.46 |
| MCD_EEBB_91 | M | 5-9   | 35-39 | MCD | FCD 2a |                             | DEPDC5 | chr22:32188751 | NM_001242896    | c.C715T          | p.R239X           | PTV      | 0.42 |
| MCD_CCF_28  | F | 0-4   | 5-9   | MCD | FCD 2b |                             | TSC2   | chr16:2103361  | NM_000548       | c.T244C          | p.W82R            | Missense | 0.48 |
| MCD_CCF_38  | M | 0-4   | 25-29 | MCD | FCD 2b |                             | MTOR   | chr1:11217299  | NM_004958       | c.T4379C         | p.L1460P          | Missense | 0.03 |
| MCD_CCF_48  | F | 5-9   | 25-29 | MCD | FCD 2b |                             | DEPDC5 | chr22:32161000 | NM_001242896    | c.G233C          | p.R78P            | Missense | 0.37 |
| MCD_CCF_48  | F | 5-9   | 25-29 | MCD | FCD 2b |                             | TSC2   | chr16:2122364  | NM_000548       | c.G2220T         | p.M740I           | Missense | 0.48 |
| MCD_CCF_49  | F | 0-4   | 35-39 | MCD | FCD 2b |                             | MTOR   | chr1:11188975  | NM_004958       | c.G5748T         | p.W1916C          | Missense | 0.46 |
| MCD_CCF_53  | M | 0-4   | 15-19 | MCD | FCD 2b |                             | MTOR   | chr1:11169376  | NM_004958       | c.T7499A         | p.I2500N          | Missense | 0.04 |
| MCD_CCF_78  | M | 0-4   | 0-4   | MCD | FCD 2b |                             | DEPDC5 | chr22:32200837 | NM_001242896    | c.C1153T         | p.R385W           | Missense | 0.43 |
| MCD_CCF_78  | M | 0-4   | 0-4   | MCD | FCD 2b |                             | NPRL3  | chr16:188253   | ENST00000399953 | c.C14T           | p.T5I             | Missense | 0.55 |
| MCD_CCF_92  | M | 5-9   | 10-14 | MCD | FCD 2b |                             | MTOR   | chr1:11187847  | NM_004958       | c.T6050C         | p.I2017T          | Missense | 0.08 |
| MCD_CCF_101 | F | 0-4   | 0-4   | MCD | FCD 2b |                             | MTOR   | chr1:11184573  | NM_004958       | c.C6644A         | p.S2215Y          | Missense | 0.03 |
| MCD_CCF_102 | M | 5-9   | 15-19 | MCD | FCD 2b |                             | MTOR   | chr1:11169377  | NM_004958       | c.A7498T         | p.I2500F          | Missense | 0.04 |
| MCD_CCF_102 | M | 5-9   | 15-19 | MCD | FCD 2b |                             | TSC1   | chr9:135804196 | NM_000368       | c.C64T           | p.R22W            | Missense | 0.42 |
| MCD_EEBB_32 | M | 10-14 | 20-24 | MCD | FCD 2b |                             | NFI    | chr17:29701091 | NM_001042492    | c.C8438T         | p.T2813I          | Missense | 0.21 |
| MCD_EEBB_67 | M | 20-24 | 30-34 | MCD | FCD 2b |                             | NFI    | chr17:29677224 | NM_001042492    | c.G7345C         | p.V2449L          | Missense | 0.40 |
| MCD_EEBB_71 | F | 0-4   | 10-14 | MCD | FCD 2b |                             | MTOR   | chr1:11188164  | NM_004958       | c.C5930A         | p.T1977K          | Missense | 0.05 |
| MCD_EEBB_80 | M | 5-9   | 15-19 | MCD | FCD 2b |                             | MTOR   | chr1:11184573  | NM_004958       | c.C6644T         | p.S2215F          | Missense | 0.03 |
| MCD_EEBB_85 | F | 0-4   | 30-34 | MCD | FCD 2b |                             | PTEN   | chr10:89623887 | NM_001304717    | c.180_181insAA   | p.L61Nfs*2        | PTV      | 0.49 |
| MCD_EEBB_92 | M | 0-4   | 0-4   | MCD | FCD 2b |                             | MTOR   | chr1:11174399  | NM_004958       | c.7276delinsCCCT | p.P2425_L2426insP | Missense | 0.03 |
| MCD_CCF_93  | F | 0-4   | 0-4   | MCD | cMCD   | HME / PMG / FCD 2a          | AKT3   | chr1:243859016 | NM_005465       | c.G49A           | p.E17K            | Missense | 0.08 |
| MCD_CCF_94  | F | 0-4   | 0-4   | MCD | cMCD   | HME / PMG / FCD 2a / FCD 1a | PTEN   | chr10:89720720 | NM_000314       | c.872dupA        | p.N292Kfs*6       | PTV      | 0.74 |

|             |   |       |       |     |      |                          |        |                |                 |                  |                   |          |      |
|-------------|---|-------|-------|-----|------|--------------------------|--------|----------------|-----------------|------------------|-------------------|----------|------|
| MCD_CCF_110 | M | 0-4   | 0-4   | MCD | cMCD | HME / PMG / FCD 2a       | AKT3   | chr1:243859016 | NM_005465       | c.G49A           | p.E17K            | Missense | 0.13 |
| MCD_EEBB_14 | F |       | 0-4   | MCD | cMCD | HME / FCD 2a             | MTOR   | chr1:1184573   | NM_004958       | c.C6644A         | p.S2215Y          | Missense | 0.10 |
| MCD_EEBB_21 | F | 0-4   | 0-4   | MCD | cMCD | HME / PMG / FCD 2a       | PIK3CA | chr3:178936091 | NM_006218       | c.G1633A         | p.E545K           | Missense | 0.16 |
| MCD_EEBB_26 | F | 0-4   | 0-4   | MCD | cMCD | HME / PMG / FCD 2a       | PIK3CA | chr3:178952085 | NM_006218       | c.A3140T         | p.H1047L          | Missense | 0.19 |
| MCD_EEBB_28 | M | 0-4   | 0-4   | MCD | cMCD | HME / FCD 2a             | MTOR   | chr1:1169377   | NM_004958       | c.A7498T         | p.I2500F          | Missense | 0.03 |
| MCD_EEBB_52 | F | 0-4   | 0-4   | MCD | cMCD | HME / PMG / FCD 2a       | PIK3CA | chr3:178936082 | NM_006218       | c.G1624A         | p.E542K           | Missense | 0.27 |
| MCD_EEBB_57 | F | 0-4   | 0-4   | MCD | cMCD | HME / PMG / FCD 2a       | AKT3   | chr1:243859016 | NM_005465       | c.G49A           | p.E17K            | Missense | 0.08 |
| MCD_EEBB_57 | F | 0-4   | 0-4   | MCD | cMCD | HME / PMG / FCD 2a       | MTOR   | chr1:11313993  | NM_004958       | c.C743T          | p.T248I           | Missense | 0.47 |
| MCD_CCF_32  | M | 0-4   | 0-4   | MCD | cMCD | PMG / FCD 2a / FCD 1a    | NPRL3  | chr16:169168   | ENST00000399953 | c.G275A          | p.R92Q            | Missense | 0.30 |
| MCD_CCF_104 | F | 0-4   | 0-4   | MCD | cMCD | PMG / FCD 2b             | MTOR   | chr1:11301647  | NM_004958       | c.A1504C         | p.K502Q           | Missense | 0.09 |
| MCD_CCF_104 | F | 0-4   | 0-4   | MCD | cMCD | PMG / FCD 2b             | TSC2   | chr16:2135289  | NM_000548       | c.A4628G         | p.H1543R          | Missense | 0.41 |
| MCD_EEBB_10 | M | 10-14 | 25-29 | MCD | cMCD | PMG / NH / FCD 2a / GG   | NRAS   | chr1:115256529 | NM_002524       | c.A182G          | p.Q61R            | Missense | 0.13 |
| MCD_EEBB_65 | F | 0-4   | 20-24 | MCD | cMCD | PMG / NH / FCD 2a / DNET | NRAS   | chr1:115256530 | NM_002524       | c.C181A          | p.Q61K            | Missense | 0.24 |
| MCD_EEBB_76 | M | 0-4   | 0-4   | MCD | cMCD | PMG / FCD 2b             | MTOR   | chr1:11174399  | NM_004958       | c.7276delinsCCCT | p.P2425_L2426insP | Missense | 0.04 |
| MCD_EEBB_89 | M | 5-9   | 20-24 | MCD | cMCD | PMG / FCD 1b             | NFI    | chr17:29483029 | NM_001042492    | c.C89A           | p.T30K            | Missense | 0.03 |
| MCD_EEBB_89 | M | 5-9   | 20-24 | MCD | cMCD | PMG / FCD 1b             | NFI    | chr17:29483016 | NM_001042492    | c.G76T           | p.G26X            | PTV      | 0.46 |
| MCD_CCF_27  | F | 0-4   | 5-9   | MCD | TSC  | FCD2b                    | TSC2   | chr16:2130169  | NM_000548       | c.3402dupC       | p.H1135Pfs*33     | PTV      | 0.45 |
| MCD_CCF_29  | F | 0-4   | 0-4   | MCD | TSC  | FCD 2b                   | TSC2   | chr16:2121603  | NM_000548       | c.C1932A         | p.C644X           | PTV      | 0.46 |
| MCD_CCF_55  | M | 0-4   | 5-9   | MCD | TSC  | FCD2b                    | TSC2   | chr16:2136739  | NM_000548       | c.T4856C         | p.F1619S          | Missense | 0.46 |
| MCD_CCF_56  | F | 0-4   | 5-9   | MCD | TSC  | FCD2b                    | TSC2   | chr16:2107157  | NM_000548       | c.826_827del     | p.M276Vfs*6I      | PTV      | 0.43 |

Legend to supplementary table 2: HS = Hippocampal sclerosis, MCD = Malformation of cortical development, LEAT = Low-grade epilepsy-associated tumor, FCD = Focal cortical dysplasia, MOGHE = mild MCD with oligodendroglial hyperplasia in epilepsy, HME = Hemimegalencephaly, PMG = Polymicrogyria, cMCD = complex MCD, TSC = tuberous sclerosis complex, MA = meningioangiomas, DNET = Dysembryoplastic neuroepithelial tumor, PXA = Pleomorphic xanthoastrocytoma, MVNT = multinodular vacuolated neuronal tumor, SEGA = Subependymal giant cell astrocytoma, PTV = Protein-truncating variant

Supplementary Table 5: Reported somatic CNV and CNN-LOH

| Sample        | Sex | Age at onset | Age at surgery | Lesion group | Pathology | Additional findings | Variant Position (hg19) | Region         | Variant type | Included LFE genes | Size (Mbp) | Allelic fraction | Recurring | Samples w/ CNV |
|---------------|-----|--------------|----------------|--------------|-----------|---------------------|-------------------------|----------------|--------------|--------------------|------------|------------------|-----------|----------------|
| HS_EEBB_7     | M   | 5-9          | 50-54          | HS           | HS Type 1 |                     | 22:18520612-51304566    | 22q            | CNN-LOH      | <i>DEPDC5</i>      | 32.8       | 0.03             | yes       | 5              |
| HS_EEBB_81    | F   | 0-4          | 25-29          | HS           | HS Type 1 | FCD 3a              | 19:50401320-59128983    | 19q13.42-13.43 | CNN-LOH      |                    | 8.7        | 0.03             | yes       | 2              |
| HS_EEBB_17    | M   | 20-24        | 25-29          | HS           | HS Type 2 | FCD 3a              | 19:54462369-59128983    | 19q13.42-13.43 | CNN-LOH      |                    | 4.7        | 0.02             | yes       | 2              |
| HS_EEBB_55    | F   | 15-19        | 45-49          | HS           | HS (NOS)  |                     | 9:86179563-141213431    | 9q21.33-34.2   | Loss         | <i>TSC1</i>        | 55.0       | 0.03             | yes       | 2              |
| LEAT_EEBB_33  | M   | 10-14        | 15-19          | LEAT         | DNET      |                     | 6:0-171115067           | 6              | Gain         | <i>MYB</i>         | 171.1      | 0.01             | yes       | 8              |
| LEAT_EEBB_36  | M   | 0-4          | 5-9            | LEAT         | DNET      |                     | 7:138562547-140335570   | 7q34           | Gain         |                    | 1.8        | 0.20             | yes       | 2              |
| LEAT_EEBB_41  | M   | 0-4          | 0-4            | LEAT         | DNET      |                     | 8:0-38684853            | 8p             | CNN-LOH      | <i>FGFR1</i>       | 38.7       | 0.11             | yes       | 2              |
| LEAT_EEBB_49  | F   | 30-34        | 30-34          | LEAT         | DNET      |                     | 19:44544237-59128983    | 19q13.31-13.4  | Loss         |                    | 14.6       | 0.05             | no        | 1              |
| LEAT_EEBB_49  | F   | 30-34        | 30-34          | LEAT         | DNET      |                     | 20:0-22746255           | 20p            | Loss         |                    | 22.7       | 0.03             | no        | 1              |
| LEAT_EEBB_55  | M   | 20-24        | 25-29          | LEAT         | DNET      |                     | 2:25568821-63939417     | 2p23.3-15      | Gain         |                    | 38.4       | 0.21             | no        | 1              |
| LEAT_EEBB_55  | M   | 20-24        | 25-29          | LEAT         | DNET      |                     | 2:0-25424397            | 2p25.3-23.3    | Loss         |                    | 25.4       | 0.26             | no        | 1              |
| LEAT_EEBB_55  | M   | 20-24        | 25-29          | LEAT         | DNET      |                     | 8:49729020-94305178     | 8q11.21-22.1   | Loss         | <i>MYBL1</i>       | 44.6       | 0.11             | no        | 1              |
| LEAT_EEBB_55  | M   | 20-24        | 25-29          | LEAT         | DNET      |                     | 13:28150993-115169878   | 13             | Loss         |                    | 87.0       | 0.26             | yes       | 2              |
| LEAT_EEBB_55  | M   | 20-24        | 25-29          | LEAT         | DNET      |                     | 15:23833737-60664030    | 15q11.2-22.2   | Loss         |                    | 36.8       | 0.05             | no        | 1              |
| LEAT_EEBB_75  | M   | 5-9          | 10-14          | LEAT         | DNET      |                     | 2:0-243199373           | 2              | Gain         |                    | 243.2      | 0.01             | yes       | 3              |
| LEAT_EEBB_75  | M   | 5-9          | 10-14          | LEAT         | DNET      |                     | 7:0-147731239           | 7              | Gain         | <i>BRAF</i>        | 147.7      | 0.02             | yes       | 18             |
| LEAT_EEBB_75  | M   | 5-9          | 10-14          | LEAT         | DNET      |                     | 7:138550994-140481402   | 7q34           | Gain         | <i>BRAF</i>        | 1.9        | 0.30             | yes       | 2              |
| LEAT_EEBB_75  | M   | 5-9          | 10-14          | LEAT         | DNET      |                     | 12:49424065-51343851    | 12q13.12       | Gain         |                    | 1.9        | 0.32             | no        | 1              |
| LEAT_EEBB_81  | M   | 45-49        | 55-59          | LEAT         | DNET      |                     | 8:0-42446238            | 8p             | CNN-LOH      | <i>FGFR1</i>       | 42.4       | 0.04             | yes       | 2              |
| LEAT_EEBB_104 | M   | 5-9          | 15-19          | LEAT         | DNET      |                     | 4:0-191154276           | 4              | Gain         |                    | 191.2      | 0.12             | yes       | 5              |
| LEAT_EEBB_104 | M   | 5-9          | 15-19          | LEAT         | DNET      |                     | 6:0-171115067           | 6              | Gain         | <i>MYB</i>         | 171.1      | 0.11             | yes       | 8              |
| LEAT_EEBB_104 | M   | 5-9          | 15-19          | LEAT         | DNET      |                     | 7:0-159138663           | 7              | Gain         | <i>RHEB, BRAF</i>  | 159.1      | 0.12             | yes       | 18             |
| LEAT_EEBB_104 | M   | 5-9          | 15-19          | LEAT         | DNET      |                     | 9:0-141213431           | 9              | Gain         | <i>TSC1</i>        | 141.2      | 0.12             | yes       | 2              |
| LEAT_EEBB_104 | M   | 5-9          | 15-19          | LEAT         | DNET      |                     | 11:0-135006516          | 11             | Gain         |                    | 135.0      | 0.13             | yes       | 5              |

|               |   |       |       |      |               |           |                        |               |         |                 |       |      |     |    |
|---------------|---|-------|-------|------|---------------|-----------|------------------------|---------------|---------|-----------------|-------|------|-----|----|
| LEAT_EEBB_104 | M | 5-9   | 15-19 | LEAT | DNET          |           | 14:1.9e+07-107349540   | 14q           | Gain    |                 | 88.3  | 0.12 | yes | 2  |
| LEAT_EEBB_104 | M | 5-9   | 15-19 | LEAT | DNET          |           | 20:0-63025520          | 20            | Gain    |                 | 63.0  | 0.12 | yes | 10 |
| LEAT_EEBB_105 | F | 35-39 | 35-39 | LEAT | DNET          |           | 6:0-171115067          | 6             | Gain    | MYB             | 171.1 | 0.02 | yes | 8  |
| LEAT_EEBB_105 | F | 35-39 | 35-39 | LEAT | DNET          |           | 7:0-159138663          | 7             | Gain    | RHEB,<br>BRAF   | 159.1 | 0.08 | yes | 18 |
| LEAT_EEBB_1   | F | 10-14 | 15-19 | LEAT | Ganglioglioma |           | 5:0-180915260          | 5             | Gain    |                 | 180.9 | 0.20 | yes | 11 |
| LEAT_EEBB_1   | F | 10-14 | 15-19 | LEAT | Ganglioglioma |           | 7:0-159138663          | 7             | Gain    | RHEB,<br>BRAF   | 159.1 | 0.21 | yes | 18 |
| LEAT_EEBB_1   | F | 10-14 | 15-19 | LEAT | Ganglioglioma |           | 11:0-135006516         | 11            | Gain    |                 | 135.0 | 0.20 | yes | 5  |
| LEAT_EEBB_1   | F | 10-14 | 15-19 | LEAT | Ganglioglioma |           | 12:0-133851895         | 12            | Gain    | KRAS,<br>PTPN11 | 133.9 | 0.20 | yes | 8  |
| LEAT_EEBB_1   | F | 10-14 | 15-19 | LEAT | Ganglioglioma |           | 19:0-59128983          | 19            | Gain    |                 | 59.1  | 0.20 | yes | 5  |
| LEAT_EEBB_1   | F | 10-14 | 15-19 | LEAT | Ganglioglioma |           | 20:0-63025520          | 20            | Gain    |                 | 63.0  | 0.19 | yes | 10 |
| LEAT_EEBB_4   | M | 0-4   | 15-19 | LEAT | Ganglioglioma |           | 10:118766183-123216161 | 10q25.3-26.13 | Loss    |                 | 4.4   | 0.22 | no  | 1  |
| LEAT_EEBB_11  | F | 5-9   | 10-14 | LEAT | Ganglioglioma |           | 1:20142866-249250621   | 1             | Gain    | AKT3            | 229.1 | 0.03 | no  | 1  |
| LEAT_EEBB_11  | F | 5-9   | 10-14 | LEAT | Ganglioglioma |           | 5:0-180915260          | 5             | Gain    |                 | 180.9 | 0.03 | yes | 11 |
| LEAT_EEBB_11  | F | 5-9   | 10-14 | LEAT | Ganglioglioma |           | 20:921971-63025520     | 20            | Gain    |                 | 62.1  | 0.07 | yes | 10 |
| LEAT_EEBB_15  | M | 15-19 | 15-19 | LEAT | Ganglioglioma | HS        | 9:0-141213431          | 9             | Loss    | TSC1            | 141.2 | 0.06 | yes | 3  |
| LEAT_EEBB_16  | M | 5-9   | 20-24 | LEAT | Ganglioglioma |           | 3:0-56942973           | 3p26.3-14.3   | Loss    | NPRL2,<br>RAF1  | 56.9  | 0.04 | no  | 1  |
| LEAT_EEBB_16  | M | 5-9   | 20-24 | LEAT | Ganglioglioma |           | 22:17725150-51304566   | 22q           | Loss    | DEPDC5          | 33.6  | 0.04 | yes | 4  |
| LEAT_EEBB_32  | F | 20-24 | 20-24 | LEAT | Ganglioglioma |           | 5:0-180915260          | 5             | Gain    |                 | 180.9 | 0.29 | yes | 11 |
| LEAT_EEBB_32  | F | 20-24 | 20-24 | LEAT | Ganglioglioma |           | 7:0-159138663          | 7             | Gain    | RHEB,<br>BRAF   | 159.1 | 0.29 | yes | 18 |
| LEAT_EEBB_32  | F | 20-24 | 20-24 | LEAT | Ganglioglioma |           | 12:0-133851895         | 12            | Gain    | KRAS,<br>PTPN11 | 133.9 | 0.29 | yes | 8  |
| LEAT_EEBB_40  | F | 10-14 | 25-29 | LEAT | Ganglioglioma | HS Type I | 19:0-59128983          | 19            | Gain    |                 | 59.1  | 0.18 | yes | 5  |
| LEAT_EEBB_40  | F | 10-14 | 25-29 | LEAT | Ganglioglioma | HS Type I | 20:0-63025520          | 20            | Gain    |                 | 63.0  | 0.19 | yes | 10 |
| LEAT_EEBB_42  | F | 20-24 | 30-34 | LEAT | Ganglioglioma |           | 21:15515843-48129895   | 21q           | CNN-LOH |                 | 32.6  | 0.05 | yes | 2  |
| LEAT_EEBB_42  | F | 20-24 | 30-34 | LEAT | Ganglioglioma |           | 22:17221495-51304566   | 22q           | CNN-LOH | DEPDC5          | 34.1  | 0.06 | yes | 5  |
| LEAT_EEBB_42  | F | 20-24 | 30-34 | LEAT | Ganglioglioma |           | 2:0-243199373          | 2             | Gain    |                 | 243.2 | 0.07 | yes | 3  |
| LEAT_EEBB_42  | F | 20-24 | 30-34 | LEAT | Ganglioglioma |           | 5:0-180915260          | 5             | Gain    |                 | 180.9 | 0.05 | yes | 11 |

|              |   |       |       |      |               |           |                           |     |      |                 |       |      |     |    |
|--------------|---|-------|-------|------|---------------|-----------|---------------------------|-----|------|-----------------|-------|------|-----|----|
| LEAT_EEBB_42 | F | 20-24 | 30-34 | LEAT | Ganglioglioma |           | 7:0-159138663             | 7   | Gain | RHEB,<br>BRAF   | 159.1 | 0.04 | yes | 18 |
| LEAT_EEBB_42 | F | 20-24 | 30-34 | LEAT | Ganglioglioma |           | 12:0-133851895            | 12  | Gain | KRAS,<br>PTPNI1 | 133.9 | 0.07 | yes | 8  |
| LEAT_EEBB_42 | F | 20-24 | 30-34 | LEAT | Ganglioglioma |           | 14:24860592-<br>107349540 | 14q | Gain |                 | 82.5  | 0.06 | yes | 2  |
| LEAT_EEBB_42 | F | 20-24 | 30-34 | LEAT | Ganglioglioma |           | 15:23226254-<br>102531392 | 15q | Gain |                 | 79.3  | 0.04 | yes | 3  |
| LEAT_EEBB_48 | M | 25-29 | 40-44 | LEAT | Ganglioglioma | HS Type I | 4:58377516-<br>191154276  | 4q  | Gain |                 | 132.8 | 0.02 | no  | 1  |
| LEAT_EEBB_63 | M | 10-14 | 15-19 | LEAT | Ganglioglioma |           | 12:0-133851895            | 12  | Gain | KRAS,<br>PTPNI1 | 133.9 | 0.05 | yes | 8  |
| LEAT_EEBB_63 | M | 10-14 | 15-19 | LEAT | Ganglioglioma |           | 18:0-78077248             | 18  | Gain |                 | 78.1  | 0.05 | no  | 1  |
| LEAT_EEBB_63 | M | 10-14 | 15-19 | LEAT | Ganglioglioma |           | 19:6547141-<br>59128983   | 19  | Gain |                 | 52.6  | 0.05 | yes | 5  |
| LEAT_EEBB_63 | M | 10-14 | 15-19 | LEAT | Ganglioglioma |           | 20:0-63025520             | 20  | Gain |                 | 63.0  | 0.05 | yes | 10 |
| LEAT_EEBB_63 | M | 10-14 | 15-19 | LEAT | Ganglioglioma |           | 13:21050575-<br>115169878 | 13  | Loss |                 | 94.1  | 0.05 | yes | 2  |
| LEAT_EEBB_70 | F | 15-19 | 20-24 | LEAT | Ganglioglioma |           | 5:0-180915260             | 5   | Gain |                 | 180.9 | 0.05 | yes | 11 |
| LEAT_EEBB_70 | F | 15-19 | 20-24 | LEAT | Ganglioglioma |           | 7:0-159138663             | 7   | Gain | RHEB,<br>BRAF   | 159.1 | 0.05 | yes | 18 |
| LEAT_EEBB_70 | F | 15-19 | 20-24 | LEAT | Ganglioglioma |           | 11:0-135006516            | 11  | Gain |                 | 135.0 | 0.11 | yes | 5  |
| LEAT_EEBB_70 | F | 15-19 | 20-24 | LEAT | Ganglioglioma |           | 13:19307875-<br>115169878 | 13  | Gain |                 | 95.9  | 0.11 | yes | 2  |
| LEAT_EEBB_74 | M | 5-9   | 10-14 | LEAT | Ganglioglioma |           | 4:0-191154276             | 4   | Gain |                 | 191.2 | 0.09 | yes | 5  |
| LEAT_EEBB_74 | M | 5-9   | 10-14 | LEAT | Ganglioglioma |           | 6:0-171115067             | 6   | Gain | MYB             | 171.1 | 0.06 | yes | 8  |
| LEAT_EEBB_74 | M | 5-9   | 10-14 | LEAT | Ganglioglioma |           | 7:0-159138663             | 7   | Gain | RHEB,<br>BRAF   | 159.1 | 0.06 | yes | 18 |
| LEAT_EEBB_74 | M | 5-9   | 10-14 | LEAT | Ganglioglioma |           | 9:0-141213431             | 9   | Gain | TSC1            | 141.2 | 0.08 | yes | 2  |
| LEAT_EEBB_74 | M | 5-9   | 10-14 | LEAT | Ganglioglioma |           | 12:0-133851895            | 12  | Gain | KRAS,<br>PTPNI1 | 133.9 | 0.06 | yes | 8  |
| LEAT_EEBB_74 | M | 5-9   | 10-14 | LEAT | Ganglioglioma |           | 16:0-90354753             | 16  | Gain | NPRL3,<br>TSC2  | 90.4  | 0.08 | yes | 3  |
| LEAT_EEBB_74 | M | 5-9   | 10-14 | LEAT | Ganglioglioma |           | 20:0-63025520             | 20  | Gain |                 | 63.0  | 0.06 | yes | 10 |
| LEAT_EEBB_80 | M | 5-9   | 5-9   | LEAT | Ganglioglioma |           | 5:0-180915260             | 5   | Gain |                 | 180.9 | 0.03 | yes | 11 |
| LEAT_EEBB_80 | M | 5-9   | 5-9   | LEAT | Ganglioglioma |           | 6:0-171115067             | 6   | Gain | MYB             | 171.1 | 0.03 | yes | 8  |
| LEAT_EEBB_80 | M | 5-9   | 5-9   | LEAT | Ganglioglioma |           | 7:0-159138663             | 7   | Gain | RHEB,<br>BRAF   | 159.1 | 0.03 | yes | 18 |
| LEAT_EEBB_80 | M | 5-9   | 5-9   | LEAT | Ganglioglioma |           | 19:0-23207354             | 19p | Gain |                 | 23.2  | 0.12 | no  | 1  |
| LEAT_EEBB_80 | M | 5-9   | 5-9   | LEAT | Ganglioglioma |           | 1:0-120110175             | 1p  | Loss | MTOR            | 120.1 | 0.08 | no  | 1  |

|               |   |       |       |      |               |           |                       |     |         |                           |       |      |     |    |
|---------------|---|-------|-------|------|---------------|-----------|-----------------------|-----|---------|---------------------------|-------|------|-----|----|
| LEAT_EEBB_80  | M | 5-9   | 5-9   | LEAT | Ganglioglioma |           | 22:17897544-51304566  | 22q | Loss    | DEPDC5                    | 33.4  | 0.06 | yes | 4  |
| LEAT_EEBB_85  | M |       | 30-34 | LEAT | Ganglioglioma |           | 4:0-191154276         | 4   | Gain    |                           | 191.2 | 0.04 | yes | 5  |
| LEAT_EEBB_85  | M |       | 30-34 | LEAT | Ganglioglioma |           | 6:0-171115067         | 6   | Gain    | MYB                       | 171.1 | 0.04 | yes | 8  |
| LEAT_EEBB_87  | F | 10-14 | 50-54 | LEAT | Ganglioglioma |           | 5:0-180915260         | 5   | Gain    |                           | 180.9 | 0.04 | yes | 11 |
| LEAT_EEBB_87  | F | 10-14 | 50-54 | LEAT | Ganglioglioma |           | 7:0-159138663         | 7   | Gain    | RHEB,<br>BRAF             | 159.1 | 0.04 | yes | 18 |
| LEAT_EEBB_87  | F | 10-14 | 50-54 | LEAT | Ganglioglioma |           | 12:0-133851895        | 12  | Gain    | KRAS,<br>PTPN11           | 133.9 | 0.04 | yes | 8  |
| LEAT_EEBB_87  | F | 10-14 | 50-54 | LEAT | Ganglioglioma |           | 20:0-63025520         | 20  | Gain    |                           | 63.0  | 0.02 | yes | 10 |
| LEAT_EEBB_98  | M | 15-19 | 15-19 | LEAT | Ganglioglioma |           | 18:18570235-78077248  | 18q | CNN-LOH |                           | 59.5  | 0.01 | no  | 1  |
| LEAT_EEBB_98  | M | 15-19 | 15-19 | LEAT | Ganglioglioma |           | 21:20190260-48129895  | 21q | CNN-LOH |                           | 27.9  | 0.03 | yes | 2  |
| LEAT_EEBB_98  | M | 15-19 | 15-19 | LEAT | Ganglioglioma |           | 4:0-191154276         | 4   | Gain    |                           | 191.2 | 0.02 | yes | 5  |
| LEAT_EEBB_98  | M | 15-19 | 15-19 | LEAT | Ganglioglioma |           | 7:0-134639161         | 7   | Gain    |                           | 134.6 | 0.03 | yes | 18 |
| LEAT_EEBB_98  | M | 15-19 | 15-19 | LEAT | Ganglioglioma |           | 11:0-135006516        | 11  | Gain    |                           | 135.0 | 0.04 | yes | 5  |
| LEAT_EEBB_101 | F | 5-9   | 10-14 | LEAT | Ganglioglioma |           | 5:0-180915260         | 5   | Gain    |                           | 180.9 | 0.29 | yes | 11 |
| LEAT_EEBB_101 | F | 5-9   | 10-14 | LEAT | Ganglioglioma |           | 6:0-171115067         | 6   | Gain    | MYB                       | 171.1 | 0.33 | yes | 8  |
| LEAT_EEBB_101 | F | 5-9   | 10-14 | LEAT | Ganglioglioma |           | 7:0-159138663         | 7   | Gain    | RHEB,<br>BRAF             | 159.1 | 0.33 | yes | 18 |
| LEAT_EEBB_101 | F | 5-9   | 10-14 | LEAT | Ganglioglioma |           | 10:0-135269349        | 10  | Gain    | PTEN                      | 135.3 | 0.32 | yes | 3  |
| LEAT_EEBB_101 | F | 5-9   | 10-14 | LEAT | Ganglioglioma |           | 15:20052938-102531392 | 15q | Gain    |                           | 82.5  | 0.32 | yes | 3  |
| LEAT_EEBB_101 | F | 5-9   | 10-14 | LEAT | Ganglioglioma |           | 20:0-63025520         | 20  | Gain    |                           | 63.0  | 0.32 | yes | 10 |
| LEAT_EEBB_101 | F | 5-9   | 10-14 | LEAT | Ganglioglioma |           | 22:16000000-51304566  | 22q | Gain    | DEPDC5                    | 35.3  | 0.31 | no  | 1  |
| LEAT_EEBB_103 | F | 15-19 | 20-24 | LEAT | Ganglioglioma | HS Type I | 2:0-243199373         | 2   | Gain    |                           | 243.2 | 0.02 | yes | 3  |
| LEAT_EEBB_103 | F | 15-19 | 20-24 | LEAT | Ganglioglioma | HS Type I | 3:0-188200897         | 3   | Gain    | NPRL2,<br>RAF1,<br>PIK3CA | 188.2 | 0.02 | no  | 1  |
| LEAT_EEBB_103 | F | 15-19 | 20-24 | LEAT | Ganglioglioma | HS Type I | 7:0-159138663         | 7   | Gain    | RHEB,<br>BRAF             | 159.1 | 0.27 | yes | 18 |
| LEAT_EEBB_103 | F | 15-19 | 20-24 | LEAT | Ganglioglioma | HS Type I | 16:0-90354753         | 16  | Gain    | NPRL3,<br>TSC2            | 90.4  | 0.02 | yes | 3  |
| LEAT_EEBB_103 | F | 15-19 | 20-24 | LEAT | Ganglioglioma | HS Type I | 9:0-141213431         | 9   | Loss    | TSC1                      | 141.2 | 0.36 | yes | 3  |
| LEAT_EEBB_103 | F | 15-19 | 20-24 | LEAT | Ganglioglioma | HS Type I | 17:0-75075664         | 17  | Loss    | NFI                       | 75.1  | 0.05 | no  | 1  |
| LEAT_EEBB_103 | F | 15-19 | 20-24 | LEAT | Ganglioglioma | HS Type I | 22:17223938-51304566  | 22q | Loss    | DEPDC5                    | 34.1  | 0.08 | yes | 4  |

|               |   |       |       |      |                            |           |                       |               |         |              |       |      |     |    |
|---------------|---|-------|-------|------|----------------------------|-----------|-----------------------|---------------|---------|--------------|-------|------|-----|----|
| LEAT_EEBB_110 | M | 5-9   | 15-19 | LEAT | Angiocentric glioma        |           | 6:135543837-163969815 | 6q23.3-24.1   | Loss    |              | 28.4  | 0.20 | yes | 2  |
| LEAT_EEBB_46  | M | 10-14 | 20-24 | LEAT | Angiocentric glioma        |           | 6:135521495-141454143 | 6q23.3-24.1   | Loss    | MYB          | 5.9   | 0.69 | yes | 2  |
| LEAT_EEBB_19  | F | 15-19 | 15-19 | LEAT | Desmoplastic Ganglioglioma |           | 5:71661131-180915260  | 5q13.2-35.3   | Loss    |              | 109.3 | 0.23 | no  | 1  |
| LEAT_EEBB_19  | F | 15-19 | 15-19 | LEAT | Desmoplastic Ganglioglioma |           | 9:73909871-86175639   | 9q21.12-21.32 | Loss    |              | 12.3  | 0.22 | no  | 1  |
| LEAT_EEBB_19  | F | 15-19 | 15-19 | LEAT | Desmoplastic Ganglioglioma |           | 9:88234954-137530346  | 9q21.33-34.2  | Loss    | TSC1         | 49.3  | 0.23 | yes | 2  |
| LEAT_EEBB_19  | F | 15-19 | 15-19 | LEAT | Desmoplastic Ganglioglioma |           | 22:23754578-51304566  | 22q           | Loss    | DEPDC5       | 27.5  | 0.22 | yes | 4  |
| LEAT_EEBB_112 | M | 5-9   | 25-29 | LEAT | IDA                        |           | 9:0-141213431         | 9             | Loss    | TSC1         | 141.2 | 0.22 | yes | 3  |
| LEAT_EEBB_112 | M | 5-9   | 25-29 | LEAT | IDA                        |           | 18:0-78077248         | 18            | Loss    |              | 78.1  | 0.24 | no  | 1  |
| LEAT_EEBB_50  | M | 25-29 | 25-29 | LEAT | IDA                        | HS Type I | 5:0-180915260         | 5             | Gain    |              | 180.9 | 0.35 | yes | 11 |
| LEAT_EEBB_50  | M | 25-29 | 25-29 | LEAT | IDA                        | HS Type I | 7:0-159138663         | 7             | Gain    | RHEB, BRAF   | 159.1 | 0.35 | yes | 18 |
| LEAT_EEBB_50  | M | 25-29 | 25-29 | LEAT | IDA                        | HS Type I | 11:0-135006516        | 11            | Gain    |              | 135.0 | 0.34 | yes | 5  |
| LEAT_EEBB_50  | M | 25-29 | 25-29 | LEAT | IDA                        | HS Type I | 12:0-133851895        | 12            | Gain    | KRAS, PTPN11 | 133.9 | 0.06 | yes | 8  |
| LEAT_EEBB_50  | M | 25-29 | 25-29 | LEAT | IDA                        | HS Type I | 13:19377679-115169878 | 13            | Gain    |              | 95.8  | 0.06 | yes | 2  |
| LEAT_EEBB_50  | M | 25-29 | 25-29 | LEAT | IDA                        | HS Type I | 17:0-81195210         | 17            | Gain    | NFI          | 81.2  | 0.24 | no  | 1  |
| LEAT_EEBB_50  | M | 25-29 | 25-29 | LEAT | IDA                        | HS Type I | 19:0-59128983         | 19            | Gain    |              | 59.1  | 0.33 | yes | 5  |
| LEAT_EEBB_50  | M | 25-29 | 25-29 | LEAT | IDA                        | HS Type I | 20:0-63025520         | 20            | Gain    |              | 63.0  | 0.03 | yes | 10 |
| LEAT_EEBB_113 | M | 0-4   | 44-49 | LEAT | MVNT                       |           | 5:0-180915260         | 5             | Gain    |              | 180.9 | 0.02 | yes | 11 |
| LEAT_EEBB_113 | M | 0-4   | 44-49 | LEAT | MVNT                       |           | 7:0-159138663         | 7             | Gain    | RHEB, BRAF   | 159.1 | 0.06 | yes | 18 |
| LEAT_EEBB_102 | F | 5-9   | 10-14 | LEAT | Pilocytic Astrocytoma      |           | 17:52121998-81195210  | 17q22-25.3    | Gain    |              | 29.1  | 0.23 | no  | 1  |
| LEAT_EEBB_95  | F | 5-9   | 34-39 | LEAT | Pilocytic Astrocytoma      |           | 17:26851501-81195210  | 17q           | CNN-LOH | NFI          | 54.3  | 0.12 | yes | 2  |
| LEAT_EEBB_95  | F | 5-9   | 34-39 | LEAT | Pilocytic Astrocytoma      |           | 4:0-191154276         | 4             | Gain    |              | 191.2 | 0.15 | yes | 5  |
| LEAT_EEBB_95  | F | 5-9   | 34-39 | LEAT | Pilocytic Astrocytoma      |           | 6:0-171115067         | 6             | Gain    | MYB          | 171.1 | 0.06 | yes | 8  |
| LEAT_EEBB_95  | F | 5-9   | 34-39 | LEAT | Pilocytic Astrocytoma      |           | 7:0-159138663         | 7             | Gain    | RHEB, BRAF   | 159.1 | 0.15 | yes | 18 |
| LEAT_EEBB_95  | F | 5-9   | 34-39 | LEAT | Pilocytic Astrocytoma      |           | 10:0-135534747        | 10            | Gain    | PTEN         | 135.5 | 0.14 | yes | 3  |
| LEAT_EEBB_95  | F | 5-9   | 34-39 | LEAT | Pilocytic Astrocytoma      |           | 19:0-59128983         | 19            | Gain    |              | 59.1  | 0.07 | yes | 5  |
| LEAT_EEBB_56  | M | 10-14 | 15-19 | LEAT | PXA                        |           | 5:0-180915260         | 5             | Gain    |              | 180.9 | 0.10 | yes | 11 |



|              |   |       |       |      |        |                                  |                           |               |         |                 |       |      |     |    |
|--------------|---|-------|-------|------|--------|----------------------------------|---------------------------|---------------|---------|-----------------|-------|------|-----|----|
| LEAT_EEBB_56 | M | 10-14 | 15-19 | LEAT | PXA    |                                  | 7:0-65796278              | 7p22.3-q11.21 | Gain    |                 | 65.8  | 0.11 | no  | 1  |
| LEAT_EEBB_56 | M | 10-14 | 15-19 | LEAT | PXA    |                                  | 10:0-135534747            | 10            | Gain    | PTEN            | 135.5 | 0.12 | yes | 3  |
| LEAT_EEBB_56 | M | 10-14 | 15-19 | LEAT | PXA    |                                  | 12:0-133851895            | 12            | Gain    | KRAS,<br>PTPN11 | 133.9 | 0.12 | yes | 8  |
| LEAT_EEBB_56 | M | 10-14 | 15-19 | LEAT | PXA    |                                  | 15:24148457-<br>102531392 | 15q           | Gain    |                 | 78.4  | 0.12 | yes | 3  |
| LEAT_EEBB_56 | M | 10-14 | 15-19 | LEAT | PXA    |                                  | 16:0-90354753             | 16            | Gain    | NPRL3,<br>TSC2  | 90.4  | 0.12 | yes | 3  |
| LEAT_EEBB_56 | M | 10-14 | 15-19 | LEAT | PXA    |                                  | 20:0-63025520             | 20            | Gain    |                 | 63.0  | 0.12 | yes | 10 |
| LEAT_EEBB_56 | M | 10-14 | 15-19 | LEAT | PXA    |                                  | 21:15463956-<br>48129895  | 21q           | Gain    |                 | 32.7  | 0.14 | no  | 1  |
| LEAT_EEBB_56 | M | 10-14 | 15-19 | LEAT | PXA    |                                  | 7:65796279-<br>159138663  | 7q            | Loss    | RHEB,<br>BRAF   | 93.3  | 0.24 | no  | 1  |
| LEAT_CCF_37  | M | 0-4   | 5-9   | LEAT | TSC    | SEGA                             | 16:0-9806375              | 16p13.3       | CNN-LOH | NPRL3,<br>TSC2  | 9.8   | 0.03 | yes | 4  |
| LEAT_CCF_37  | M | 0-4   | 5-9   | LEAT | TSC    | SEGA                             | 7:0-159138663             | 7             | Gain    | RHEB,<br>BRAF   | 159.1 | 0.14 | yes | 18 |
| LEAT_EEBB_17 | F | 0-4   | 5-9   | LEAT | TSC    | SEGA                             | 16:0-16081737             | 16p13.3       | CNN-LOH | NPRL3,<br>TSC2  | 16.1  | 0.09 | yes | 4  |
| MCD_CCF_62   | F | 5-9   | 5-9   | MCD  | FCD 2a | Hyaline astrocytic<br>inclusions | 1:146523045-<br>249250621 | 1q            | Gain    | AKT3            | 102.7 | 0.06 | yes | 2  |
| MCD_CCF_62   | F | 5-9   | 5-9   | MCD  | FCD 2a | Hyaline astrocytic<br>inclusions | 16:47304567-<br>90354753  | 16q12.1-24.3  | Loss    |                 | 43.1  | 0.06 | no  | 1  |
| MCD_EEBB_68  | M | 5-9   | 40-44 | MCD  | FCD 2a |                                  | 22:18009909-<br>49085205  | 22q           | CNN-LOH | DEPDC5          | 31.1  | 0.04 | yes | 5  |
| MCD_EEBB_75  | M | 0-4   | 10-14 | MCD  | FCD 2a |                                  | 22:19183787-<br>51304566  | 22q           | CNN-LOH | DEPDC5          | 32.1  | 0.04 | yes | 5  |
| MCD_EEBB_94  | F | 0-4   | 0-4   | MCD  | FCD 2a |                                  | 22:1.6e+07-<br>51304566   | 22q           | CNN-LOH | DEPDC5          | 35.3  | 0.04 | yes | 5  |
| MCD_EEBB_110 | M | 0-4   | 5-9   | MCD  | FCD 2a | Hyaline astrocytic<br>inclusions | 1:145723739-<br>249250621 | 1q            | Gain    | AKT3            | 103.5 | 0.08 | yes | 2  |
| MCD_CCF_48   | F | 5-9   | 25-29 | MCD  | FCD 2b |                                  | 9:71034203-<br>141213431  | 9q21.11-34.3  | CNN-LOH | TSC1            | 70.2  | 0.09 | no  | 1  |
| MCD_CCF_48   | F | 5-9   | 25-29 | MCD  | FCD 2b |                                  | 16:0-3367061              | 16p13.3       | CNN-LOH | NPRL3,<br>TSC2  | 3.4   | 0.05 | yes | 4  |
| MCD_CCF_90   | F | 0-4   | 0-4   | MCD  | FCD 2b |                                  | 7:0-159138663             | 7             | Gain    | RHEB,<br>BRAF   | 159.1 | 0.05 | yes | 18 |
| MCD_EEBB_104 | F |       | 15-19 | MCD  | FCD 2b |                                  | 4:93918343-<br>191154276  | 4q22.2-35.2   | CNN-LOH |                 | 97.2  | 0.02 | no  | 1  |
| MCD_CCF_71   | F | 0-4   | 0-4   | MCD  | cMCD   | PMG / NH                         | 1:203644628-<br>234525940 | 1q32.1-42.2   | Gain    |                 | 30.9  | 0.06 | no  | 1  |
| MCD_CCF_94   | F | 0-4   | 0-4   | MCD  | cMCD   | HME / PMG / FCD<br>2a / FCD 1a   | 10:75324903-<br>135534747 | 10q22.2-26.3  | CNN-LOH | PTEN            | 60.2  | 0.15 | no  | 1  |
| MCD_CCF_104  | F | 0-4   | 0-4   | MCD  | cMCD   | PMG / FCD 2b                     | 16:0-12353187             | 16p13.3       | CNN-LOH | NPRL3,<br>TSC2  | 12.4  | 0.04 | yes | 4  |
| MCD_EEBB_89  | M | 5-9   | 20-24 | MCD  | cMCD   | PMG / FCD 1b                     | 17:28305017-<br>81195210  | 17q           | CNN-LOH | NF1             | 52.9  | 0.06 | yes | 2  |

Legend to supplementary table 3: LFE = lesional focal epilepsy, CNV = Copy number variant, LEAT = Low-grade epilepsy-associated tumor, MCD = Malformation of cortical development, HS = Hippocampal sclerosis, DNET = Dysembryoplastic neuroepithelial tumor, IDA = Isomorphic diffuse astrocytoma, PXA = Pleomorphic xanthoastrocytoma, MVNT = multinodular vacuolated neuronal tumor, SEGA = Subependymal giant cell astrocytoma, TSC = Tuberous sclerosis complex, FCD = Focal cortical dysplasia, HME = Hemimegalencephaly, cMCD = complex MCD, PMG = Polymicrogyria, CNN-LOH = Copy number neutral loss of heterozygosity
